# Supplementary material for: Multiplex plasma protein profiling identifies novel markers to discriminate patients with adenocarcinoma of the lung
Source: PubMed Central journal article supplement (PMC6664554; doi:10.1186/s12885-019-5943-3), 2019-07-29
Supplement: 12885_2019_5943_MOESM1_ESM.pdf [file 12885_2019_5943_MOESM1_ESM.pdf]

**Additional file 1: Table S1.** Proteins included in the Olink Multiplex Oncology II panel and the corresponding p-value when comparing protein levels in LAC vs benign, CRC metastases and typical carcinoids.

| Protein name                                                  | Gene name     | mean |      | mean   |        | mean    |         | mean |      | mean    |            | p-val<br>LAC vs<br>benign | p-val<br>LAC vs<br>benign* | p-val<br>LAC vs<br>CRC | p-val<br>LAC<br>vs typical<br>carcinoid |
|---------------------------------------------------------------|---------------|------|------|--------|--------|---------|---------|------|------|---------|------------|---------------------------|----------------------------|------------------------|-----------------------------------------|
|                                                               |               | NPX  | SD   | NPX    | SD     | NPX     | SD      | NPX  | SD   | NPX     | SD         |                           |                            |                        |                                         |
|                                                               |               | LAC  | LAC  | benign | benign | benign* | benign* | CRC  | CRC  | typical | SD typical |                           |                            |                        |                                         |
| Vascular endothelial growth factor receptor 2                 | VEGFR-2       | 5.84 | 0.30 | 5.99   | 0.27   | 5.91    | 0.26    | 5.66 | 0.33 | 5.86    | 0.33       | 0.00 ↓                    | 0.24                       | 0.00 ↑                 | 0.72                                    |
| Receptor tyrosine-protein kinase erbB-3                       | ERBB3         | 6.68 | 0.34 | 6.84   | 0.26   | 6.68    | 0.29    | 6.62 | 0.30 | 6.71    | 0.29       | 0.00 ↓                    | 0.97                       | 0.14                   | 0.87                                    |
| VEGF-co regulated chemokine 1                                 | CXCL17        | 4.85 | 0.70 | 4.28   | 0.74   | 4.18    | 0.68    | 4.19 | 0.60 | 3.89    | 0.80       | 0.00 ↑                    | 0.00 ↑                     | 0.00 ↑                 | 0.00 ↑                                  |
| Carcinoembryonic antigen-related cell adhesion molecule 5     | CEACAM5       | 2.81 | 1.55 | 1.56   | 0.66   | 1.48    | 0.66    | 2.02 | 1.36 | 1.56    | 0.68       | 0.00 ↑                    | 0.00 ↑                     | 0.00 ↑                 | 0.00 ↑                                  |
| Carcinoembryonic antigen-related cell adhesion molecule 1     | CEACAM1       | 6.30 | 0.28 | 6.44   | 0.26   | 6.30    | 0.25    | 6.25 | 0.28 | 6.28    | 0.28       | 0.00                      | 0.99                       | 0.15                   | 0.44                                    |
| Vascular endothelial growth factor receptor 3                 | VEGFR-3       | 4.97 | 0.36 | 5.13   | 0.41   | 4.94    | 0.47    | 4.86 | 0.39 | 4.90    | 0.36       | 0.00                      | 0.81                       | 0.03                   | 0.18                                    |
| WAP four-disulfide core domain protein 2                      | WFDC2         | 6.73 | 0.52 | 6.51   | 0.52   | 6.43    | 0.50    | 6.26 | 0.52 | 6.15    | 0.48       | 0.00                      | 0.00                       | 0.00 ↑                 | 0.00 ↑                                  |
| Transmembrane glycoprotein NMB                                | GPNMB         | 5.09 | 0.30 | 5.21   | 0.26   | 5.10    | 0.21    | 5.15 | 0.27 | 5.10    | 0.23       | 0.01                      | 0.84                       | 0.12                   | 0.80                                    |
| Nectin-4                                                      | PVRL4         | 5.03 | 0.63 | 4.82   | 0.50   | 4.69    | 0.54    | 4.75 | 0.56 | 4.69    | 0.44       | 0.01                      | 0.00                       | 0.00                   | 0.00 ↑                                  |
| TNF-related apoptosis-inducing ligand                         | TNFSF10       | 6.55 | 0.40 | 6.70   | 0.34   | 6.57    | 0.35    | 6.60 | 0.40 | 6.62    | 0.37       | 0.01                      | 0.81                       | 0.75                   | 0.44                                    |
| Interleukin-6                                                 | IL-6          | 2.47 | 1.28 | 2.15   | 1.54   | 1.79    | 1.04    | 2.01 | 1.12 | 1.52    | 1.13       | 0.01                      | 0.01                       | 0.02                   | 0.00 ↑                                  |
| Midkine                                                       | MK            | 5.96 | 0.70 | 5.74   | 0.59   | 5.60    | 0.53    | 5.85 | 0.74 | 5.65    | 0.58       | 0.01                      | 0.01                       | 0.23                   | 0.00                                    |
| Tumor necrosis factor ligand superfamily member 13            | TNFSF13       | 7.61 | 0.42 | 7.48   | 0.46   | 7.38    | 0.43    | 7.53 | 0.49 | 7.28    | 0.42       | 0.01                      | 0.00                       | 0.22                   | 0.00 ↑                                  |
| R-spondin-3                                                   | RSP03         | 2.79 | 0.64 | 2.57   | 0.52   | 2.52    | 0.57    | 2.79 | 0.56 | 2.63    | 0.50       | 0.01                      | 0.02                       | 0.46                   | 0.19                                    |
| Disintegrin and metalloproteinase domain-containing protein 8 | ADAM 8        | 3.34 | 0.41 | 3.49   | 0.41   | 3.28    | 0.34    | 3.24 | 0.39 | 3.31    | 0.34       | 0.01                      | 0.45                       | 0.11                   | 0.60                                    |
| Amphiregulin                                                  | AR            | 1.25 | 0.69 | 1.03   | 0.51   | 0.96    | 0.51    | 1.22 | 0.83 | 0.98    | 0.57       | 0.02                      | 0.01                       | 0.39                   | 0.00                                    |
| Fibroblast growth factor-binding protein 1                    | FGF-BP1       | 3.87 | 0.68 | 4.01   | 0.49   | 3.84    | 0.40    | 3.90 | 0.69 | 3.86    | 0.36       | 0.02                      | 0.73                       | 0.78                   | 0.48                                    |
| Kallikrein-14                                                 | hK14          | 5.45 | 0.58 | 5.23   | 0.57   | 5.20    | 0.54    | 5.41 | 0.57 | 5.53    | 0.44       | 0.02                      | 0.05                       | 0.87                   | 0.50                                    |
| Galectin-1                                                    | Gal-1         | 5.08 | 0.38 | 5.20   | 0.34   | 5.09    | 0.35    | 5.01 | 0.34 | 4.95    | 0.36       | 0.02                      | 0.85                       | 0.18                   | 0.04                                    |
| SPARC                                                         | SPARC         | 5.20 | 0.35 | 5.30   | 0.36   | 5.22    | 0.40    | 5.16 | 0.36 | 5.14    | 0.34       | 0.02                      | 0.59                       | 0.51                   | 0.24                                    |
| Tissue factor pathway inhibitor 2                             | TFPI-2        | 6.80 | 0.84 | 6.51   | 0.53   | 6.41    | 0.54    | 6.67 | 0.72 | 6.46    | 0.52       | 0.02                      | 0.01                       | 0.32                   | 0.00                                    |
| ICOS ligand                                                   | ICOSLG        | 2.61 | 0.36 | 2.74   | 0.31   | 2.61    | 0.27    | 2.62 | 0.28 | 2.65    | 0.25       | 0.02                      | 0.75                       | 0.97                   | 0.64                                    |
| Tumor necrosis factor receptor superfamily member 6B          | TNFRSF6B      | 3.50 | 0.74 | 3.29   | 0.65   | 3.06    | 0.56    | 3.39 | 0.75 | 3.09    | 0.67       | 0.02                      | 0.00                       | 0.22                   | 0.00 ↑                                  |
| CD48 antigen                                                  | CD48          | 5.28 | 0.50 | 5.45   | 0.46   | 5.25    | 0.36    | 5.23 | 0.51 | 5.31    | 0.50       | 0.02                      | 0.78                       | 0.69                   | 0.85                                    |
| Integrin alpha-V                                              | ITGAV         | 1.91 | 0.38 | 2.02   | 0.32   | 1.96    | 0.33    | 1.96 | 0.36 | 1.92    | 0.26       | 0.03                      | 0.52                       | 0.34                   | 0.98                                    |
| Proto-oncogene tyrosine-protein kinase receptor Ret           | RET           | 2.36 | 0.55 | 2.53   | 0.63   | 2.25    | 0.50    | 2.52 | 0.45 | 2.69    | 0.47       | 0.03                      | 0.41                       | 0.02                   | 0.00 ↓                                  |
| T-lymphocyte surface antigen Ly-9                             | LY9           | 3.98 | 0.46 | 4.14   | 0.41   | 3.97    | 0.34    | 3.95 | 0.48 | 4.00    | 0.46       | 0.03                      | 0.83                       | 0.49                   | 0.88                                    |
| Stem cell factor                                              | SCF           | 7.59 | 0.66 | 7.78   | 0.57   | 7.79    | 0.50    | 7.78 | 0.50 | 7.69    | 0.51       | 0.04                      | 0.15                       | 0.02                   | 0.28                                    |
| Tumor necrosis factor ligand superfamily member 6             | FASLG         | 7.54 | 0.57 | 7.72   | 0.50   | 7.73    | 0.48    | 7.63 | 0.53 | 7.89    | 0.55       | 0.04                      | 0.19                       | 0.18                   | 0.00 ↓                                  |
| Protein CYR61                                                 | CYR61         | 4.48 | 0.51 | 4.36   | 0.42   | 4.24    | 0.47    | 4.50 | 0.56 | 4.37    | 0.52       | 0.04                      | 0.01                       | 0.84                   | 0.19                                    |
| Cathepsin L2                                                  | CTSV          | 2.23 | 0.55 | 2.31   | 0.45   | 2.40    | 0.41    | 2.24 | 0.47 | 2.51    | 0.43       | 0.06                      | 0.04                       | 0.72                   | 0.00 ↓                                  |
| Integrin beta-5                                               | ITGB5         | 6.74 | 0.46 | 6.82   | 0.44   | 6.71    | 0.44    | 6.71 | 0.48 | 6.57    | 0.45       | 0.08                      | 0.88                       | 0.84                   | 0.03                                    |
| Kallikrein-13                                                 | KLK13         | 3.91 | 0.64 | 3.80   | 0.61   | 3.65    | 0.63    | 3.77 | 0.62 | 3.92    | 0.52       | 0.09                      | 0.04                       | 0.04                   | 0.64                                    |
| Tumor necrosis factor receptor superfamily member 19          | TNFRSF19      | 3.06 | 0.62 | 2.96   | 0.53   | 2.88    | 0.52    | 3.01 | 0.54 | 2.86    | 0.51       | 0.09                      | 0.04                       | 0.56                   | 0.02                                    |
| Methionine aminopeptidase 2                                   | MetAP2        | 4.46 | 0.91 | 4.66   | 0.86   | 4.74    | 0.82    | 4.39 | 0.86 | 4.45    | 0.80       | 0.09                      | 0.11                       | 0.68                   | 0.94                                    |
| Protein S100-A11                                              | S100A11       | 2.30 | 0.71 | 2.11   | 0.49   | 2.19    | 0.68    | 2.10 | 0.45 | 2.17    | 0.78       | 0.10                      | 0.17                       | 0.11                   | 0.06                                    |
| Pancreatic prohormone                                         | PPY           | 3.55 | 1.49 | 3.18   | 1.18   | 3.42    | 0.99    | 3.47 | 1.28 | 3.33    | 1.89       | 0.11                      | 0.70                       | 0.80                   | 0.15                                    |
| Seizure 6-like protein                                        | SEZ6L         | 3.94 | 0.44 | 4.02   | 0.32   | 3.96    | 0.30    | 4.05 | 0.44 | 3.99    | 0.34       | 0.12                      | 0.80                       | 0.06                   | 0.49                                    |
| MHC class I polypeptide-related sequence A and B              | MIC-A/B       | 2.78 | 1.63 | 3.00   | 1.39   | 2.75    | 1.31    | 2.83 | 1.58 | 3.09    | 1.25       | 0.14                      | 0.58                       | 0.71                   | 0.74                                    |
| Glypican-1                                                    | GPC1          | 2.84 | 0.41 | 2.92   | 0.44   | 2.71    | 0.47    | 2.90 | 0.39 | 2.89    | 0.38       | 0.14                      | 0.17                       | 0.09                   | 0.62                                    |
| Kallikrein-11                                                 | hK11          | 4.53 | 0.54 | 4.43   | 0.48   | 4.39    | 0.49    | 4.32 | 0.46 | 4.42    | 0.53       | 0.14                      | 0.08                       | 0.00                   | 0.14                                    |
| Podocalyxin                                                   | PODXL         | 2.53 | 0.29 | 2.61   | 0.27   | 2.55    | 0.25    | 2.54 | 0.26 | 2.55    | 0.22       | 0.14                      | 0.98                       | 0.96                   | 0.90                                    |
| Mothers against decapentaplegic homolog 5                     | MAD homolog 5 | 2.54 | 0.31 | 2.58   | 0.27   | 2.51    | 0.23    | 2.50 | 0.29 | 2.45    | 0.26       | 0.14                      | 0.53                       | 0.34                   | 0.03                                    |
| Receptor tyrosine-protein kinase erbB-4                       | ERBB4         | 3.69 | 0.41 | 3.76   | 0.31   | 3.70    | 0.32    | 3.67 | 0.40 | 3.71    | 0.29       | 0.15                      | 1.00                       | 0.88                   | 0.90                                    |
| Ly6/PLAUR domain-containing protein 3                         | LYPD3         | 2.79 | 0.43 | 2.87   | 0.51   | 2.72    | 0.45    | 2.69 | 0.45 | 2.94    | 0.42       | 0.17                      | 0.63                       | 0.18                   | 0.12                                    |
| Carbonic anhydrase 9                                          | CA9           | 1.78 | 0.85 | 1.60   | 0.78   | 1.67    | 0.98    | 2.03 | 1.04 | 1.44    | 1.10       | 0.17                      | 0.47                       | 0.14                   | 0.00                                    |
| Syndecan-1                                                    | SYND1         | 5.84 | 0.77 | 5.71   | 0.75   | 5.42    | 0.63    | 5.70 | 0.72 | 5.64    | 0.61       | 0.18                      | 0.00                       | 0.25                   | 0.27                                    |
| Folate receptor alpha                                         | FR-alpha      | 5.72 | 0.52 | 5.63   | 0.41   | 5.50    | 0.42    | 5.53 | 0.55 | 5.54    | 0.47       | 0.21                      | 0.04                       | 0.01                   | 0.02                                    |
| Interferon gamma receptor 1                                   | IFN-gamma-R1  | 2.71 | 0.38 | 2.78   | 0.32   | 2.64    | 0.26    | 2.76 | 0.42 | 2.74    | 0.35       | 0.23                      | 0.21                       | 0.21                   | 0.68                                    |
| WNT1-inducible-signaling pathway protein 1                    | WISP-1        | 3.46 | 0.51 | 3.52   | 0.48   | 3.30    | 0.45    | 3.46 | 0.58 | 3.26    | 0.48       | 0.24                      | 0.25                       | 0.82                   | 0.02                                    |
| Insulin-like growth factor 1 receptor                         | IGF1R         | 2.40 | 0.35 | 2.45   | 0.33   | 2.33    | 0.27    | 2.33 | 0.37 | 2.33    | 0.30       | 0.24                      | 0.45                       | 0.18                   | 0.16                                    |
| Mesothelin                                                    | MSLN          | 1.62 | 0.92 | 1.48   | 0.84   | 1.31    | 0.76    | 1.01 | 0.75 | 0.98    | 0.75       | 0.26                      | 0.12                       | 0.00 ↑                 | 0.00 ↑                                  |
| Protein S100-A4                                               | S100A4        | 1.45 | 0.60 | 1.54   | 0.53   | 1.52    | 0.60    | 1.31 | 0.44 | 1.42    | 0.53       | 0.26                      | 0.59                       | 0.05                   | 0.29                                    |
| Delta-like protein 1                                          | DLL1          | 8.13 | 0.45 | 8.22   | 0.39   | 8.04    | 0.38    | 8.10 | 0.45 | 8.03    | 0.41       | 0.27                      | 0.20                       | 0.88                   | 0.14                                    |
| Pro-epidermal growth factor                                   | EGF           | 7.30 | 1.67 | 7.05   | 1.74   | 7.03    | 1.77    | 7.17 | 1.84 | 7.28    | 1.61       | 0.30                      | 0.45                       | 0.77                   | 0.89                                    |
| Vascular endothelial growth factor A                          | VEGF-A        | 9.16 | 0.58 | 9.10   | 0.60   | 8.92    | 0.57    | 8.90 | 0.57 | 8.80    | 0.50       | 0.30                      | 0.02                       | 0.00                   | 0.00 ↑                                  |

|                                                                   |            |      |      |      |      |      |      |      |      |      |      |      |      |      |      |
|-------------------------------------------------------------------|------------|------|------|------|------|------|------|------|------|------|------|------|------|------|------|
| Secretary carrier-associated membrane protein 3                   | SCAMP3     | 3.53 | 1.42 | 3.71 | 1.54 | 3.56 | 1.43 | 3.35 | 1.42 | 3.32 | 1.28 | 0.34 | 1.00 | 0.44 | 0.42 |
| 5'-nucleotidase                                                   | 5-NT       | 8.67 | 0.57 | 8.80 | 0.75 | 8.55 | 0.68 | 9.03 | 0.81 | 8.74 | 0.64 | 0.35 | 0.24 | 0.00 | 0.49 |
| Hepatocyte growth factor                                          | HGF        | 5.41 | 0.68 | 5.30 | 0.48 | 5.11 | 0.45 | 5.29 | 0.61 | 5.11 | 0.59 | 0.37 | 0.02 | 0.33 | 0.00 |
| Granzyme H                                                        | GZMH       | 3.14 | 1.46 | 3.06 | 1.48 | 3.10 | 1.96 | 3.23 | 1.65 | 3.03 | 1.48 | 0.37 | 0.14 | 0.94 | 0.41 |
| Wnt inhibitory factor 1                                           | WIF-1      | 4.31 | 0.49 | 4.33 | 0.38 | 4.29 | 0.35 | 4.33 | 0.52 | 4.39 | 0.48 | 0.43 | 0.99 | 0.69 | 0.37 |
| Ephrin type-A receptor 2                                          | EPHA2      | 0.89 | 0.40 | 0.85 | 0.33 | 0.73 | 0.30 | 0.90 | 0.34 | 0.77 | 0.29 | 0.45 | 0.03 | 0.41 | 0.07 |
| CD160 antigen                                                     | CD160      | 3.98 | 0.62 | 4.03 | 0.53 | 3.92 | 0.48 | 4.00 | 0.58 | 4.04 | 0.50 | 0.49 | 0.79 | 0.87 | 0.55 |
| Tyrosine-protein kinase Lyn                                       | LYN        | 1.58 | 0.82 | 1.64 | 0.83 | 1.69 | 0.71 | 1.57 | 0.78 | 1.60 | 0.75 | 0.49 | 0.49 | 0.98 | 0.87 |
| Transforming growth factor alpha                                  | TGF-alpha  | 0.88 | 0.62 | 0.91 | 0.52 | 0.87 | 0.55 | 0.73 | 0.62 | 0.62 | 0.46 | 0.51 | 0.94 | 0.04 | 0.00 |
| Toll-like receptor 3                                              | TLR3       | 4.14 | 0.79 | 4.06 | 0.83 | 4.14 | 0.70 | 4.13 | 0.76 | 4.12 | 0.76 | 0.53 | 0.78 | 0.81 | 0.69 |
| Cornulin                                                          | CRNN       | 4.12 | 0.94 | 4.24 | 1.12 | 4.15 | 1.19 | 3.86 | 0.81 | 4.34 | 0.94 | 0.54 | 0.93 | 0.03 | 0.10 |
| Endothelial cell-specific molecule 1                              | ESM-1      | 7.79 | 0.56 | 7.83 | 0.51 | 7.72 | 0.41 | 7.87 | 0.67 | 7.73 | 0.51 | 0.55 | 0.70 | 0.22 | 0.42 |
| Tyrosine-protein kinase ABL1                                      | ABL1       | 3.32 | 1.22 | 3.20 | 1.20 | 3.35 | 1.21 | 3.22 | 1.23 | 3.28 | 1.16 | 0.56 | 0.88 | 0.66 | 0.77 |
| Melanoma-derived growth regulatory protein                        | MIA        | 9.14 | 0.36 | 9.13 | 0.32 | 9.09 | 0.32 | 9.20 | 0.35 | 9.18 | 0.30 | 0.57 | 0.33 | 0.13 | 0.38 |
| C-type lectin domain family 4 member K                            | CD207      | 1.50 | 0.51 | 1.43 | 0.51 | 1.42 | 0.47 | 1.45 | 0.47 | 1.58 | 0.39 | 0.57 | 0.32 | 0.44 | 0.33 |
| Receptor tyrosine-protein kinase erbB-2                           | ERBB2      | 5.66 | 0.48 | 5.71 | 0.40 | 5.59 | 0.32 | 5.69 | 0.37 | 5.68 | 0.42 | 0.60 | 0.21 | 0.69 | 0.71 |
| Fc receptor-like B                                                | FCRLB      | 0.76 | 0.65 | 0.78 | 0.62 | 0.67 | 0.58 | 0.81 | 0.72 | 0.58 | 0.44 | 0.61 | 0.71 | 0.67 | 0.12 |
| Kallikrein-8                                                      | hK8        | 5.02 | 0.60 | 5.11 | 0.51 | 5.01 | 0.55 | 4.99 | 0.53 | 5.15 | 0.46 | 0.63 | 0.42 | 0.64 | 0.37 |
| TGF-beta receptor type-2                                          | TGFR-2     | 6.16 | 0.56 | 6.15 | 0.47 | 5.95 | 0.43 | 6.17 | 0.50 | 6.02 | 0.50 | 0.63 | 0.01 | 0.80 | 0.07 |
| A disintegrin and metalloproteinase with thrombospondin motifs 15 | ADAM-TS 15 | 2.92 | 0.53 | 2.89 | 0.56 | 2.76 | 0.49 | 3.00 | 0.49 | 3.00 | 0.49 | 0.70 | 0.19 | 0.16 | 0.35 |
| Alpha-taxilin                                                     | TXLNA      | 4.60 | 1.41 | 4.50 | 1.41 | 4.66 | 1.43 | 4.54 | 1.51 | 4.50 | 1.29 | 0.73 | 0.75 | 0.96 | 0.55 |
| Carboxypeptidase E                                                | CPE        | 2.55 | 0.41 | 2.57 | 0.43 | 2.58 | 0.51 | 2.55 | 0.43 | 2.60 | 0.39 | 0.75 | 0.78 | 0.75 | 0.69 |
| CD27 antigen                                                      | CD27       | 7.09 | 0.57 | 7.13 | 0.51 | 7.01 | 0.43 | 6.90 | 0.49 | 6.87 | 0.46 | 0.75 | 0.42 | 0.01 | 0.02 |
| CD70 antigen                                                      | CD70       | 2.56 | 0.60 | 2.56 | 0.53 | 2.40 | 0.44 | 2.64 | 0.59 | 2.43 | 0.54 | 0.77 | 0.12 | 0.41 | 0.17 |
| Furin                                                             | FURIN      | 2.83 | 0.41 | 2.85 | 0.47 | 2.63 | 0.42 | 2.75 | 0.46 | 2.61 | 0.64 | 0.77 | 0.02 | 0.20 | 0.00 |
| Tumor necrosis factor receptor superfamily member 4               | TNFRSF4    | 2.26 | 0.64 | 2.34 | 0.79 | 2.17 | 0.51 | 2.21 | 0.63 | 2.08 | 0.52 | 0.79 | 0.53 | 0.66 | 0.13 |
| Granzyme B                                                        | GZMB       | 2.27 | 1.21 | 2.22 | 1.07 | 2.33 | 1.42 | 2.29 | 1.11 | 2.13 | 0.98 | 0.85 | 0.39 | 0.59 | 0.76 |
| Folate receptor gamma                                             | FR-gamma   | 7.04 | 2.33 | 7.03 | 2.31 | 6.38 | 1.89 | 6.68 | 1.86 | 6.92 | 2.35 | 0.86 | 0.07 | 0.79 | 0.10 |
| Vimentin                                                          | VIM        | 2.80 | 1.11 | 2.70 | 0.99 | 2.62 | 1.25 | 2.49 | 0.99 | 2.27 | 1.16 | 0.86 | 0.42 | 0.06 | 0.00 |
| T-cell leukemia / lymphoma protein 1A                             | TCL1A      | 4.69 | 1.74 | 4.53 | 1.75 | 4.89 | 2.03 | 4.86 | 1.37 | 4.76 | 1.38 | 0.87 | 0.60 | 0.19 | 0.46 |
| C-X-C motif chemokine 13                                          | CXCL13     | 7.94 | 0.76 | 8.05 | 0.99 | 7.84 | 0.92 | 7.73 | 0.78 | 7.67 | 0.82 | 0.89 | 0.31 | 0.04 | 0.02 |
| FAS-associated death domain protein                               | FADD       | 1.50 | 1.06 | 1.50 | 1.04 | 1.58 | 1.04 | 1.31 | 1.08 | 1.51 | 1.05 | 0.91 | 0.70 | 0.24 | 0.93 |
| Mucin-16                                                          | MUC-16     | 3.15 | 1.34 | 3.07 | 1.16 | 2.87 | 1.20 | 2.66 | 0.92 | 2.85 | 1.00 | 0.91 | 0.46 | 0.02 | 0.34 |
| Xaa-Pro aminopeptidase 2                                          | XPNPEP2    | 5.44 | 1.02 | 5.43 | 1.02 | 5.36 | 0.96 | 5.31 | 0.91 | 5.65 | 0.77 | 0.93 | 0.66 | 0.13 | 0.46 |
| Cyclin-dependent kinase inhibitor 1                               | DKN1A      | 3.51 | 1.71 | 3.54 | 1.66 | 3.50 | 1.54 | 3.54 | 1.66 | 3.52 | 1.57 | 0.93 | 0.99 | 0.82 | 0.90 |
| Annexin A1                                                        | ANXA1      | 1.76 | 1.02 | 1.65 | 0.75 | 1.75 | 1.03 | 1.42 | 0.63 | 1.56 | 0.98 | 0.94 | 0.68 | 0.02 | 0.07 |

NPX: normalized protein expression

LAC: lung adenocarcinoma

benign\*: benign samples where inflammatory related diseases were excluded

SD: standard deviation

CRC met: colorectal metastasis

↑: upregulated in LAC

↓: downregulated in LAC

The grey cells indicate protein values with an adjusted p-val <0.05
